# Supplementary material for: Coating Fe3O4 quantum dots with glutamic acid to achieve enhanced catalysis for facile and sensitive detection of chromium(vi) in water
Source: Royal Society of Chemistry journal article supplement (doi:10.1039/d4ay01408a), 2024-01-01
Supplement: d4ay01408a1.pdf [file d4ay01408a1.pdf]

## Supporting Information

Coating Fe<sub>3</sub>O<sub>4</sub> quantum dots with Glutamic Acid showing enhanced catalysis for facile and sensitive detection of Chromium(VI) in water

Guidan Huang<sup>a</sup>, Hongying Ye<sup>a</sup>, Xuejian Mo<sup>a</sup>, Ruizheng Hao<sup>a</sup>, Guanhui Huang<sup>a</sup>, Jinhua Liang<sup>a</sup>, Deqiang Wang<sup>b</sup>, Xiaofen Xiao<sup>\*b</sup> and Wenyuan Zhu<sup>\*a</sup>

<sup>a</sup> Guangxi Key Laboratory of Electrochemical and Magneto-chemical Functional Materials, College of Chemistry and Bioengineering, Guilin University of Technology, Guilin 541006, P. R. China

<sup>b</sup>Key Laboratory of Carbon Materials of Zhejiang Province, College of Chemistry and Materials Engineering, Wenzhou University, Wenzhou, Zhejiang 325035, China

\* Corresponding authors

E-mail addresses: xiaoxf3@mail2.sysu.edu.cn (X Xiao), wyzhu@glut.edu.cn (W Zhu).

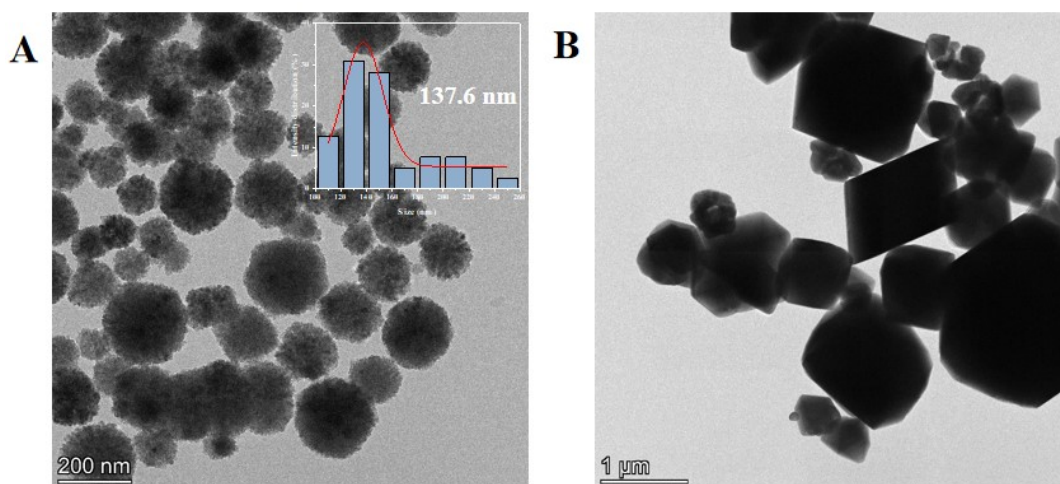

**Figure S1. TEM image of Fe<sub>3</sub>O<sub>4</sub> NPs (A) and Bare-Fe<sub>3</sub>O<sub>4</sub> QDs (B) (inset: particle size distribution histogram).**

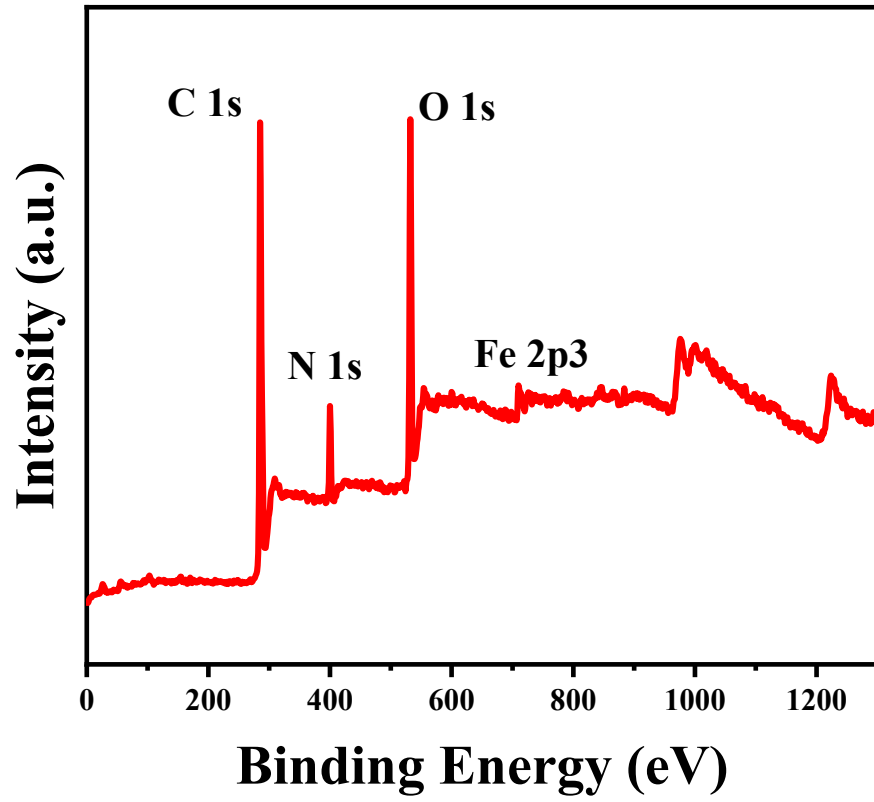

Figure S2. XPS spectra of Glu-Fe<sub>3</sub>O<sub>4</sub> QDs.

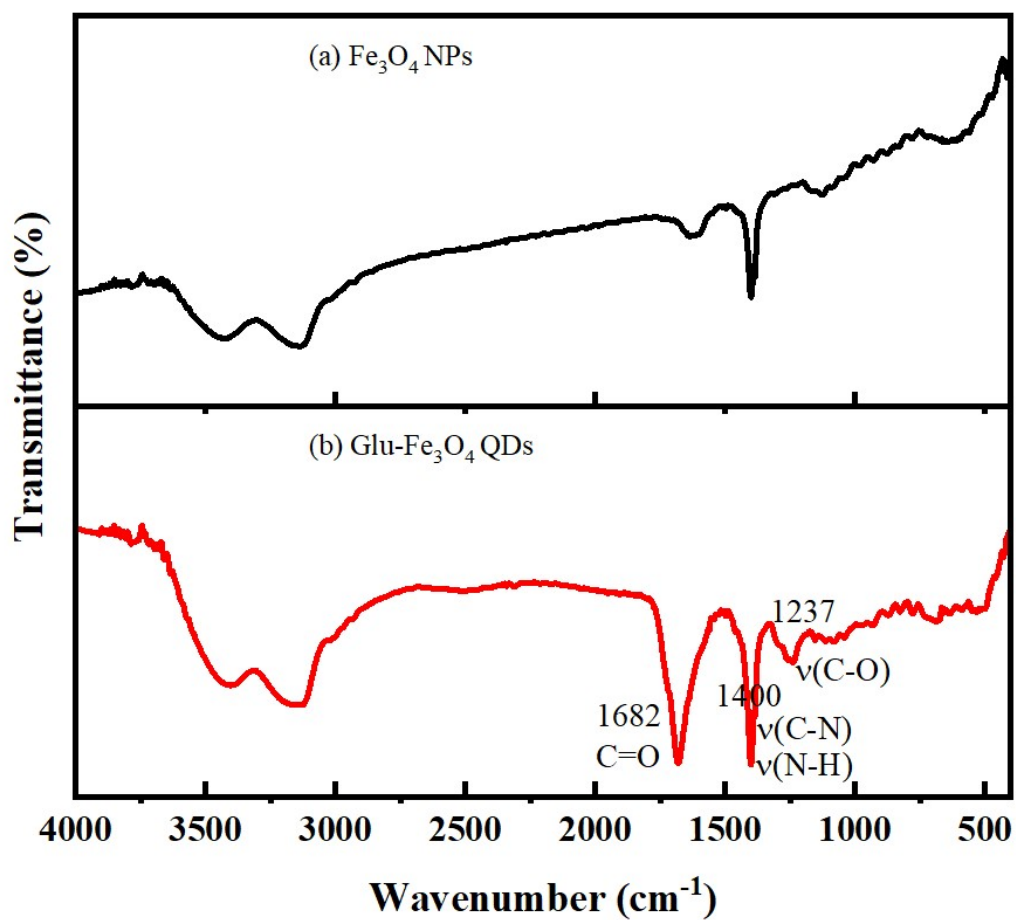

Figure S3. Infrared spectra of  $\text{Fe}_3\text{O}_4$  NPs and Glu- $\text{Fe}_3\text{O}_4$  QDs.

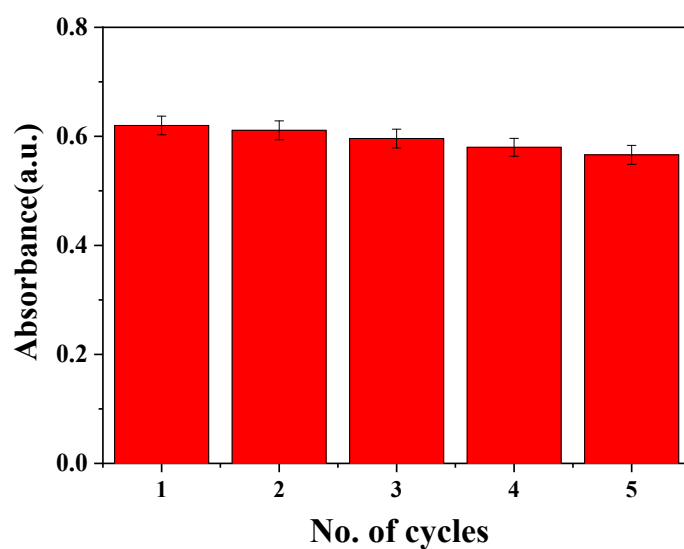

Figure S4. Recyclability test for Glu- $\text{Fe}_3\text{O}_4$  QDs.

**Table S1 Performance of the proposed approach compared to others**

| <b>Method</b>       | <b>Detecting element</b>                                                    | <b>Analytical<br/>range</b> | <b>LOD</b>  | <b>Ref.</b>          |
|---------------------|-----------------------------------------------------------------------------|-----------------------------|-------------|----------------------|
| Colorimetric        | Fe <sub>3</sub> O <sub>4</sub> QDs                                          | 1-8 μM                      | 31.02<br>nM | <b>This<br/>work</b> |
| Colorimetric        | Cu-PyC-MOF                                                                  | 0.5-50 μM                   | 51 nM       | [26]                 |
| Colorimetric        | BSA-Au NPs/STCPs                                                            | 0.5 nM-50 μM                | 280 nM      | [27]                 |
| Colorimetric        | Au@Hg                                                                       | 1 nM-2 μM                   | 0.71 nM     | [18]                 |
| Colorimetric        | Fe <sub>3</sub> O <sub>4</sub> /Ti <sub>3</sub> C <sub>2</sub> MXene<br>QDs | 0-60 μM                     | 260 nM      | [28]                 |
| Colorimetric        | Au-Ag/I-Cys-rGO                                                             | 0-200 μM                    | 26.39<br>μM | [29]                 |
| Colorimetric        | CoFe <sub>2</sub> O <sub>4</sub> /H <sub>2</sub> PPOP                       | 0.6–100 μM                  | 26 nM       | [30]                 |
| Colorimetric        | MOF-199                                                                     | 0.1-30 μM                   | 20 nM       | [31]                 |
| Electrochemi<br>cal | Honeycomb-like<br>AuNPs                                                     | 0.5-300 μM                  | 0.15 μM     | [32]                 |
| Fluorescence        | SQDs@UiO-66-NH <sub>2</sub>                                                 | 0-220 μM                    | 170 nM      | [33]                 |
| Fluorescence        | Co(II)-CDs                                                                  | 5-125 μM                    | 1.17 μM     | [34]                 |
